# Supplementary material for: Adaptive wind-evoked power devices for autonomous motor control applications
Source: Royal Society of Chemistry journal article supplement (doi:10.1039/d2tc01933g), 2022-01-01
Supplement: d2tc01933g1.pdf [file d2tc01933g1.pdf]

## Supporting information

### Adaptive Wind-Evoked Power Devices for Autonomous Motor Control Applications

Wei Sha<sup>a,b,†</sup>, Qilin Hua<sup>a,b,†</sup>, Yuanhong Shi<sup>a,c</sup>, Jiangwen Wang<sup>a,b</sup>, Xiao Cui<sup>a,b</sup>, Zilong Dong<sup>a,c</sup>,  
Bingjun Wang<sup>a,c</sup>, Jianan Niu<sup>a,b</sup>, Weiguo Hu<sup>a,b,c,\*</sup>

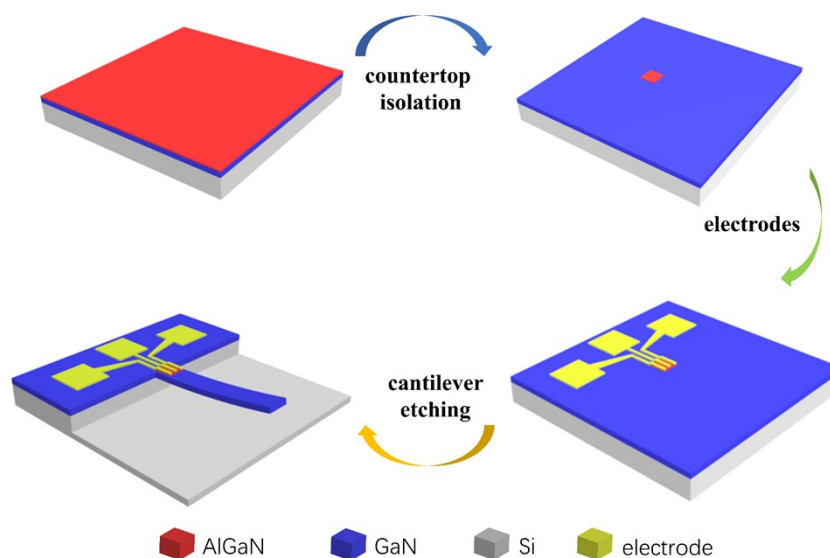

**Fig. S1** The schematic illustration of cantilever device fabrication process. The cantilever device was fabricated by the micro-nano processing technology, including countertop isolation, source/drain ohmic electrode, gate Schottky contact, and cantilever dry etching.

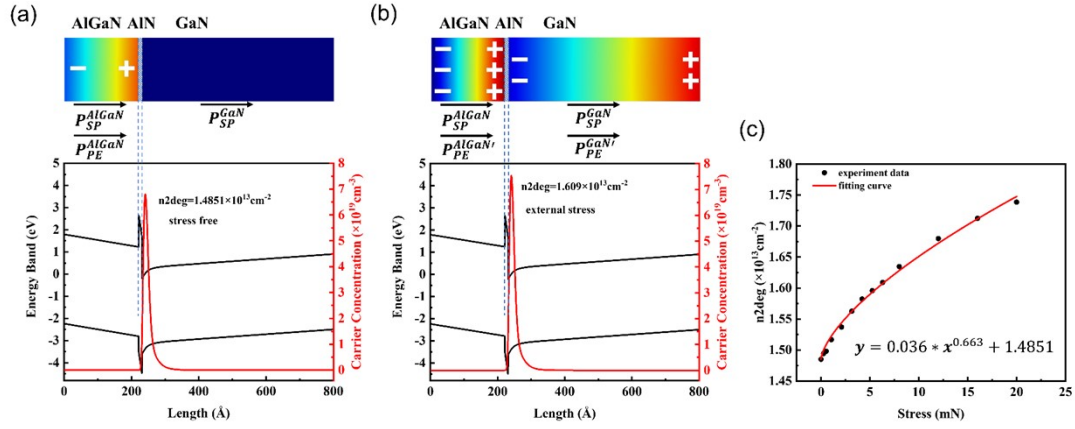

**Fig. S2** Work mechanisms of AlGaIn/AlN/GaN heterojunction under external stress. Energy band diagrams at the interface of AlGaIn/AlN/GaN heterojunction (a) under stress-free and (b) under external stress. (c) The 2DEG density as a function of the external stress and the corresponding fitting curves.

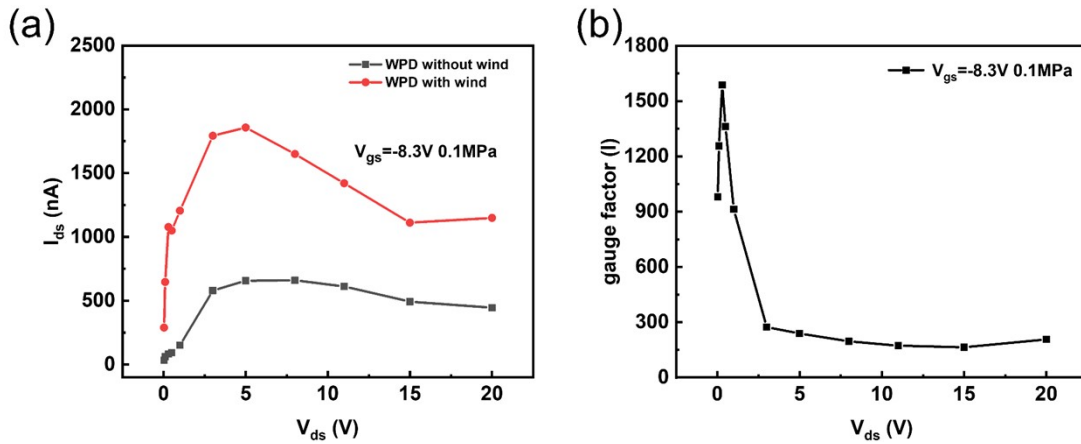

**Fig. S3** The strain sensitivity of the WPD at  $V_{gs} = -8.3 \text{ V}$ . (a) The  $I_{ds}$  dependence of the  $V_{ds}$  with/without the  $0.1 \text{ MPa}$  wind pressure at  $V_{gs} = -8.3 \text{ V}$ . (b) The gauge factor of current as a function of the  $V_{ds}$ .
